# Supplementary material for: Clinical outcomes and mutation analysis of carbon ion radiotherapy for bladder urothelial carcinoma
Source: Research Square preprint supplement (doi:10.21203/rs.3.rs-6725919/v1), 2025-07-10
Supplement: Supplementary file 1 [file 1008cb7017710551327b30a9.xlsx]

## Sheet: Supplementary table 2
No	seqnames	start	end	width	ref	alt	totalDepth	refDepth	altDepth	VariantFreq	SYMBOL	GeneID	Feature	HGVSc	HGVSp	Amino_acids	Codons	BIOTYPE	EXON	Consequence	VariantType	VariantID
5	chr1	27106333	27106333	1	G	A	1872	976	896	47.8632	ARID1A	8289	NM_006015.6	c.5944G>A	p.Val1982Ile	p.V1982I	Gtc/Atc	protein_coding	'20/20'	missense_variant	Likely germline	chr1:27106333:G:A
	chr11	69456209	69456209	1	C	T	1547	786	761	49.192	CCND1	595	NM_053056.3	c.128C>T	p.Ser43Phe	p.S43F	tCc/tTc	protein_coding	'1/5'	missense_variant	Likely germline	chr11:69456209:C:T
	chr16	89813029	89813029	1	C	G	1704	932	772	45.3052	FANCA	2175	NM_000135.4	c.3476G>C	p.Cys1159Ser	p.C1159S	tGc/tCc	protein_coding	'35/43'	missense_variant	Likely germline	chr16:89813029:C:G
6	chr4	1795762	1795762	1	G	A	834	425	409	49.0408	FGFR3	2261	NM_000142.4	c.101G>A	p.Arg34Gln	p.R34Q	cGa/cAa	protein_coding	'2/18'	missense_variant	Likely germline	chr4:1795762:G:A
	chr5	1295228	1295228	1	G	A	1088	780	308	28.3088	TERT	7015	NM_198253.3	NA	NA	NA	NA	protein_coding	NA	upstream_gene_variant	Somatic	chr5:1295228:G:A
	chr9	5534906	5534906	1	G	A	777	148	629	80.9524	PDCD1LG2	80380	NM_025239.4	c.217G>A	p.Ala73Thr	p.A73T	Gcc/Acc	protein_coding	'3/7'	missense_variant	Likely somatic	chr9:5534906:G:A
	chr22	29090060	29090060	1	C	T	876	465	411	46.9178	CHEK2	11200	NM_007194.4	c.1421G>A	p.Arg474His	p.R474H	cGt/cAt	protein_coding	'13/15'	missense_variant	Likely germline	chr22:29090060:C:T
7	chr3	178936091	178936091	1	G	A	1416	1140	276	19.4915	PIK3CA	5290	NM_006218.4	c.1633G>A	p.Glu545Lys	p.E545K	Gag/Aag	protein_coding	'10/21'	missense_variant	Somatic	chr3:178936091:G:A
	chr5	1295228	1295228	1	G	A	830	716	114	13.7349	TERT	7015	NM_198253.3	NA	NA	NA	NA	protein_coding	NA	upstream_gene_variant	Somatic	chr5:1295228:G:A
	chr6	117609714	117609714	1	G	T	803	376	427	53.1756	ROS1	6098	NM_002944.2	c.6985C>A	p.Pro2329Thr	p.P2329T	Cct/Act	protein_coding	'43/43'	missense_variant	Likely germline	chr6:117609714:G:T
	chr6	117647453	117647453	1	C	T	993	557	436	43.9074	ROS1	6098	NM_002944.2	c.5491G>A	p.Val1831Ile	p.V1831I	Gta/Ata	protein_coding	'33/43'	missense_variant	Likely germline	chr6:117647453:C:T
	chr12	133249391	133249391	1	G	T	1420	468	952	67.0423	POLE	5426	NM_006231.4	c.1508C>A	p.Ala503Asp	p.A503D	gCc/gAc	protein_coding	'15/49'	missense_variant	Likely somatic	chr12:133249391:G:T
	chr12	133249752	133249752	1	C	T	1172	838	334	28.4983	POLE	5426	NM_006231.4	c.1471G>A	p.Glu491Lys	p.E491K	Gag/Aag	protein_coding	'14/49'	missense_variant&splice_region_variant	Likely somatic	chr12:133249752:C:T
	chr17	7578208	7578208	1	T	C	1234	731	503	40.7618	TP53	7157	NM_000546.5	c.641A>G	p.His214Arg	p.H214R	cAt/cGt	protein_coding	'6/11'	missense_variant	Somatic	chr17:7578208:T:C
