# Supplementary material for: Clinical outcomes and mutation analysis of carbon ion radiotherapy for bladder urothelial carcinoma
Source: Research Square preprint supplement (doi:10.21203/rs.3.rs-6725919/v1), 2025-07-10
Supplement: Supplementary file 2 [file 97f61c718ceae7168bf9ad90.xlsx]

## Sheet: Sheet1
No	History of treatment	Sex	Age (year)	KPS	T stage	Number of tumors	N stage	M stage	TNM stage	TURBT	Pathological grade	Total dose (Gy(RBE))	Distant	Recurrence	Single nucleotide variation	Follow-up time (months)	Efficacy evaluation	acute toxicity	late toxicity
1	Initial	Male	56	80	T2	2	N0	M0	II	No	high	68	Lung	bladder		30.8	Death	Grade 1 radiation cystitis	Grade 2 radiation cystitis
2	relapse	Male	48	90	T2	1	N0	M0	II	Yes	high	68				35.6	partial response	Grade 1 radiation cystitis	Grade 2 radiation cystitis
3	Initial	Female	81	60	T2	1	N1	M0	III	No	low	64				32.5	complete response	Grade 1 radiation cystitis
4	Initial	Male	69	90	T2	2	N0	M0	II	No	high	74				30.4	complete response	Grade 2 radiation cystitis
5	relapse	Male	69	80	T4a	2	N0	M0	III	Yes	high	74	bone	bladder	ARID1A V1982I CCND1 S43F FANCA C1159S	29.5	progressive disease
6	relapse	Male	32	90	T2	2	N0	M0	II	Yes	low	68			FGFR3 R34Q PDCD1LG2 A73T CHEK2 R474H	26.5	partial response	Grade 1 radiation cystitis	Grade 1 radiation cystitis
7	Initial	Male	70	90	T3b	2	N0	M0	III	Yes	high	68			PIK3CA E545K ROS1 P2329T ROS1 V1831I POLE A503D POLE E491K TP53 H214R	26.3	complete response	Grade 1 radiation cystitis
8	relapse	Male	70	80	T2	2	N0	M1	IV	Yes	high	72				19.6	partial response
9	relapse	Male	69	90	T2	1	N0	M0	II	Yes	high	72				19.2	complete response
10	Initial	Male	43	80	T4a	1	N1	M1	IV	Yes	high	72				18.3	partial response	Grade 2 radiation cystitis, Grade 2 gastrointestinal reaction
